# Supplementary figures and images for: Helicobacter pylori-induced activation of β-catenin involves low density lipoprotein receptor-related protein 6 and Dishevelled
Source: Springer Nature journal article supplement (doi:10.1186/1476-4598-9-31), 2010-02-05

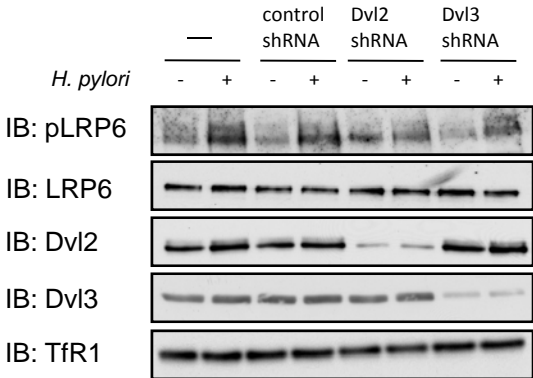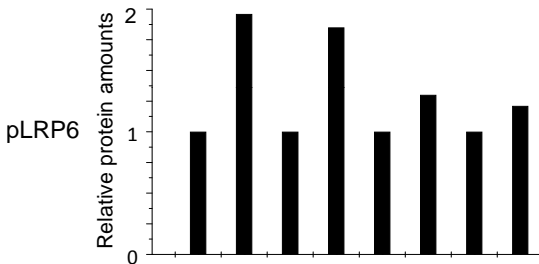

Supplement: 12943_2009_546_MOESM2_ESM.pdf [file 12943_2009_546_MOESM2_ESM.pdf]
